# Supplementary material
Source: Springer Nature journal article supplement (https://www.springermedizin.de/resource/supplementary/13023_2013_725_MOESM6_ESM.pdf/9642954)
Supplement: MOESM6 [file 9642954]

**a** D222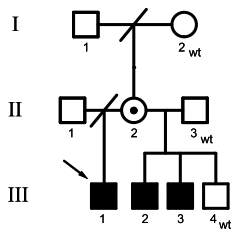**b**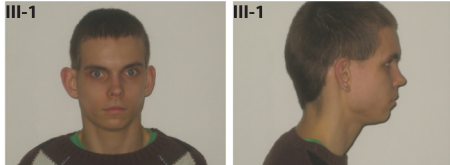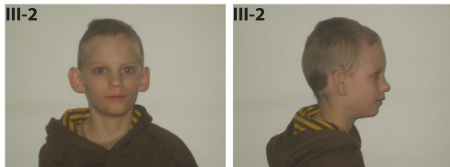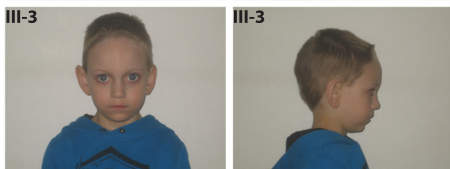**c**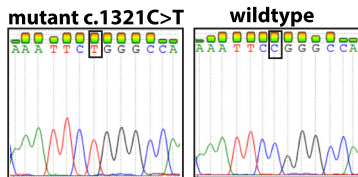**d**

|              |   |   |   |   |   |   |   |   |   |
|--------------|---|---|---|---|---|---|---|---|---|
| ZMYM3_RAT    | F | S | K | F | R | A | N | K | G |
| ZMYM3_MOUSE  | F | S | K | F | R | A | N | K | G |
| ZMYM3_HUMAN  | F | S | K | F | R | A | N | K | G |
| ZMYM3_BOVINE | F | S | K | F | R | A | N | K | G |
| ZMYM3_HORSE  | F | S | K | F | R | A | N | K | G |
